# Supplementary material for: Specific ion effects on the electrochemical properties of cytochrome c
Source: Royal Society of Chemistry journal article supplement (doi:10.1039/c2cp23401g), 2011-12-23
Supplement: c2cp23401g.pdf [file c2cp23401g.pdf]

## Supporting Information:

### Specific Ion effects on the Electrochemical Properties of Cytochrome c

Luca Medda,<sup>a,b</sup> Andrea Salis,<sup>\*b</sup> Edmond Magner<sup>\*a</sup>

<sup>a</sup> Department of Chemical and Environmental Sciences & Materials and Surface Science Institute, SFI-SRC in Solar Energy Conversion, University of Limerick, Limerick, Ireland. Email: [edmond.magner@ul.ie](mailto:edmond.magner@ul.ie)

<sup>b</sup> Department of Chemical Sciences, University of Cagliari-CSGI and CNBS, Cittadella Universitaria, S.S. 554 bivio Sestu, 09042- Monserrato (CA), Italy. E-mail: [asalis@unica.it](mailto:asalis@unica.it)

Fax: +39 070 6754388; Tel: +39 070 6754362;

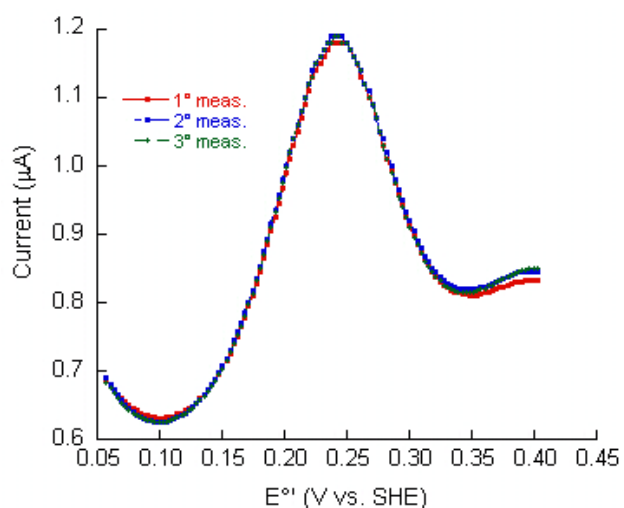

**Fig. 1S** Dfferential pulse voltammograms obtained at 4,4'-bipyridyl modified gold electrodes in three different solutions of *cyt c* in the presence of 0.2 M NaCl at 298K
